# Supplementary material for: Combined microbiome and metabolomics analysis of Taorong-type baijiu high-temperature Daqu and medium-temperature Daqu
Source: PeerJ journal article supplement (doi:10.7717/peerj.16621), 2024-01-03

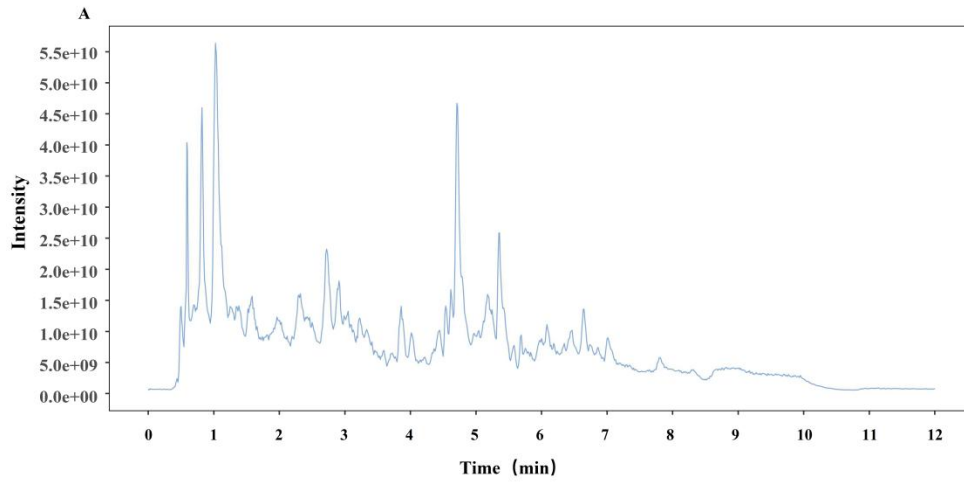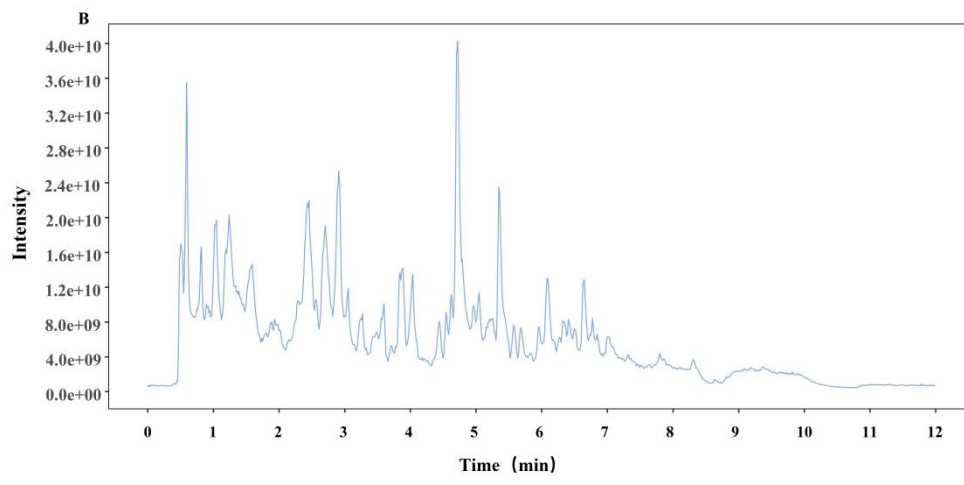

Supplement: Supplementary_Fig1.pdf [file Supplementary_Fig1.pdf]
